# Supplementary material
Source: PubMed Central journal article supplement (PMC7572613)
Supplement: NIHMS1631968-supplement-1.pdf [file NIHMS1631968-supplement-1.pdf]

Supplemental Table 1. Area under the curve (AUC) for survival comparison across models using sST2 as a continuous variable

| Model             | ST2 TIA              |                          |       | ST2 ELISA            |                          |       |
|-------------------|----------------------|--------------------------|-------|----------------------|--------------------------|-------|
|                   | AUC ( $\pm$ SD)      | $\Delta$ AUC ( $\pm$ SD) | P     | AUC ( $\pm$ SD)      | $\Delta$ AUC ( $\pm$ SD) | P     |
| <b>ST2</b>        | 0.729 ( $\pm$ 0.036) | NA                       |       | 0.716 ( $\pm$ 0.048) | NA                       |       |
| <b>MAGGIC</b>     | 0.757 ( $\pm$ 0.034) | NA                       |       |                      |                          |       |
| <b>MAGGIC +</b>   | 0.786                | 0.030                    | 0.025 | 0.793                | 0.036                    | 0.033 |
| <b>ST2</b>        | ( $\pm$ 0.031)       | ( $\pm$ 0.013)           |       | ( $\pm$ 0.028)       | ( $\pm$ 0.017)           |       |
| <b>MAGGIC +</b>   | 0.809 ( $\pm$ 0.025) | NA                       |       |                      |                          |       |
| <b>NTproBNP</b>   |                      |                          |       |                      |                          |       |
| <b>MAGGIC +</b>   | 0.813                | 0.004                    | 0.350 | 0.818                | 0.009                    | 0.263 |
| <b>NTproBNP +</b> | ( $\pm$ 0.027)       | ( $\pm$ 0.005)           |       | ( $\pm$ 0.048)       | ( $\pm$ 0.008)           |       |
| <b>ST2</b>        |                      |                          |       |                      |                          |       |

AUC, area under the curve (calculated from survival data using the method of Uno et al.)  
 ELISA, enzyme-linked immunosorbent assay; HR, hazard ratio; MAGGIC, Meta-analysis Global Group in Chronic Heart Failure; NTproBNP, N-terminal pro b-type natriuretic peptide; P, p-value; TIA, turbidimetric immunoassay; sST2, soluble suppression tumorigenicity 2

Supplemental Table 2. Area under the curve (AUC) for survival comparison across models using dichotomized soluble ST2 measurement.

| Model                          | ST2 TIA                 |                          |         | ST2 ELISA               |                          |         |
|--------------------------------|-------------------------|--------------------------|---------|-------------------------|--------------------------|---------|
|                                | AUC ( $\pm$ SD)         | $\Delta$ AUC ( $\pm$ SD) | P value | AUC ( $\pm$ SD)         | $\Delta$ AUC ( $\pm$ SD) | P value |
| <b>ST2</b>                     | 0.672 ( $\pm$ 0.048)    | NA                       |         | 0.651 ( $\pm$ 0.036)    | NA                       |         |
| <b>MAGGIC</b>                  | 0.757 ( $\pm$ 0.034)    | NA                       |         |                         |                          |         |
| <b>MAGGIC + ST2</b>            | 0.785<br>( $\pm$ 0.031) | 0.029<br>( $\pm$ 0.020)  | 0.153   | 0.784<br>( $\pm$ 0.033) | 0.028<br>( $\pm$ 0.016)  | 0.090   |
| <b>MAGGIC + NTproBNP</b>       | 0.809 ( $\pm$ 0.025)    | NA                       |         |                         |                          |         |
| <b>MAGGIC + NTproBNP + ST2</b> | 0.813<br>( $\pm$ 0.027) | 0.003<br>( $\pm$ 0.011)  | 0.709   | 0.813<br>( $\pm$ 0.026) | 0.005<br>( $\pm$ 0.010)  | 0.655   |

AUC was calculated from survival data using the method of Uno et al. ST2 dichotomized as  $>35$  vs not. AUC, area under the curve; ELISA, enzyme-linked immunosorbent assay; MAGGIC, Meta-analysis Global Group in Chronic Heart Failure; NTproBNP, N-terminal pro b-type natriuretic peptide; P, p-value; TIA, turbidimetric immunoassay; sST2, soluble suppression tumorigenicity 2
